# Supplementary material for: coronaSPAdes: from biosynthetic gene clusters to RNA viral assemblies
Source: Oxford University Press journal article supplement (doi:10.1093/bioinformatics/btab597), 2021-08-16
Supplement: btab597_supplementary_data.zip [file btab597_supplementary_data.zip]

Archive with 3 entries (3 files):
- hiv.csv
- influenza.csv
- supplementary.pdf
