# Supplementary material for: coronaSPAdes: from biosynthetic gene clusters to RNA viral assemblies
Source: Oxford University Press journal article supplement (doi:10.1093/bioinformatics/btab597), 2021-08-16
Supplement: btab597_supplementary_data.zip [file btab597_supplementary_data.zip › hiv.csv]

Dataset	coronaSPAdes	rnaviralSPAdes	rnaSPAdes	metaSPAdes	IVA	Trinity	MEGAHIT
ERR732065	4592/1.404/0	4592/1.017/0	8329/1.954/1	4249/1.022/0	4586/1.012/0	3627/2.038/0	9080/1.034/0
ERR732066	7368/1.85/0	7367/1.008/0	7437/2.757/1	7362/1.005/0	7366/1.001/0	4585/1.565/1	7165/1.011/0
ERR732067	3049/1.251/0	3049/1.11/2	3144/1.772/0	3983/1.203/0	3049/1.01/0	4649/1.556/0	3991/1.525/3
ERR732068	4579/1.174/0	4579/1.056/0	4573/4.028/3	4579/1.02/0	4579/1.013/0	4578/1.211/0	3919/1.017/1
ERR732069	4518/1.317/0	2735/1.421/0	3888/3.315/0	4576/1.615/0	4551/1.027/0	4645/1.913/1	2997/1.404/1
ERR732070	4574/1.06/1	4573/1.037/0	4573/2.253/0	4581/1.033/0	2165/1.035/0	3560/1.96/0	2324/1.281/0
ERR732071	4601/1.532/0	4600/1.113/0	4600/3.647/0	4789/1.45/0	2954/1.005/0	4591/2.493/1	3657/1.152/5
ERR732072	4571/2.405/0	3122/1.035/0	3485/3.887/3	4571/2.367/1	4572/1.25/0	4590/3.151/0	3099/1.437/1
ERR732073	8758/87.847/0	2227/1.86/2	2503/11.391/3	1112/1.452/0	4600/1.678/0	5007/4.863/0	1304/6.697/53
ERR732074	7753/30.964/0	4145/1.933/0	3499/12.752/2	2619/1.225/0	4771/1.045/0	4747/3.728/0	3604/8.047/58
ERR732075	7768/1.172/1	8771/1.156/1	4881/1.148/1	2424/1.138/1	None/0.0/None	4582/2.778/1	7943/1.165/2
ERR732076	8929/1.06/0	8775/1.083/0	8667/4.395/1	5597/1.036/0	8667/1.072/0	7800/2.235/2	2938/4.888/37
ERR732077	8771/1.086/2	7958/1.094/1	5924/2.201/4	2100/1.079/0	6115/1.14/0	8771/2.484/0	2693/4.292/31
ERR732078	8771/1.213/0	8771/1.215/0	7859/6.807/2	1208/1.039/0	8771/1.07/0	8667/2.176/1	1888/6.086/35
ERR732079	8774/1.521/0	8775/1.187/0	6857/3.775/1	1656/1.031/0	8771/1.062/0	5428/1.952/0	3238/2.975/15
ERR732080	8756/15.188/1	8905/1.139/1	4423/3.708/7	2577/1.119/1	5531/1.061/0	4772/2.438/4	1734/4.567/37
ERR732081	8805/147.008/1	6968/1.101/1	3758/7.373/5	1542/1.041/2	7297/1.11/2	7189/2.137/1	1866/4.787/64
ERR732082	8923/47.3/1	8899/1.077/1	6062/1.912/1	3585/1.047/1	4524/1.058/0	7285/1.794/2	3966/1.68/4
ERR732083	9076/65.262/0	6118/1.207/0	2884/4.88/4	2005/1.19/0	7199/1.022/0	4797/2.836/3	2318/2.356/36
ERR732084	2719/1.304/0	2719/1.256/0	2184/1.255/0	2146/1.054/0	None/0.0/None	1862/1.663/0	3396/1.411/0
ERR732085	4797/1.751/0	4441/1.338/0	8593/2.236/0	2143/1.066/0	3055/1.036/0	4720/2.946/1	3965/1.62/1
ERR732086	8753/1.168/0	8205/1.102/0	4765/2.23/3	1657/1.028/0	9036/1.017/0	7852/2.838/0	6545/2.039/10
ERR732087	4561/1.097/1	4561/1.179/0	7815/4.223/1	1410/1.053/1	9027/1.036/0	4717/3.047/4	2903/2.173/9
ERR732088	2537/25.465/0	5858/1.731/2	3323/12.286/24	840/1.3/0	4266/1.411/0	4519/2.628/3	1637/4.277/51
ERR732089	8715/12.766/0	6160/1.188/0	6767/3.653/3	2511/1.048/0	7368/1.032/0	3555/1.916/0	2773/1.999/4
ERR732090	8678/39.375/1	7368/1.349/1	4664/4.934/7	1565/1.097/0	7290/1.009/0	4042/1.67/1	2149/2.69/30
ERR732091	8046/50.496/0	8887/1.134/0	4013/7.807/4	1648/1.122/1	5237/1.046/0	9011/2.918/2	2048/2.556/24
ERR732092	8749/47.076/0	3663/1.346/0	4781/7.098/10	2840/1.115/0	6000/1.176/1	9013/3.427/1	3233/2.575/37
ERR732093	7450/1.309/0	3022/1.269/0	7321/1.29/0	3021/1.106/0	3027/1.047/0	3022/1.486/0	5789/1.428/3
ERR732094	8745/40.595/0	2604/1.51/1	3237/6.925/4	1786/1.416/0	4134/1.328/0	6608/2.439/0	2765/2.721/31
ERR732095	5531/30.31/3	3215/1.512/1	4195/5.963/5	2785/1.076/1	3344/1.277/0	8323/3.07/2	2707/2.83/30
ERR732096	7042/101.545/0	3411/1.488/0	2702/8.835/7	2301/1.167/0	3436/1.445/2	8745/3.128/0	1905/2.852/57
ERR732097	8727/31.172/0	2685/1.769/2	2514/9.269/5	1689/1.092/0	5920/1.567/2	8757/3.289/0	1533/2.865/31
ERR732098	9032/1.233/0	4481/1.185/0	9054/5.072/4	2725/1.061/0	8816/1.011/0	4880/2.447/0	2796/2.175/9
ERR732099	7085/2.014/1	6972/1.252/1	6766/3.758/5	2207/1.099/0	9054/1.002/0	7228/2.096/3	3240/2.616/31
ERR732100	9011/7.008/0	4506/1.276/0	6866/1.794/0	3392/1.081/0	7537/1.089/0	4722/2.427/1	2422/2.363/8
ERR732101	8786/7.019/0	4212/1.223/0	4705/5.957/7	2084/1.04/0	7395/1.045/0	3342/2.558/0	2034/3.752/53
ERR732102	8725/59.818/0	4780/1.858/1	3960/10.242/2	1856/1.089/0	-	3588/3.941/3	3221/4.106/39
ERR732103	8899/1.531/0	8905/1.183/0	8899/2.133/1	1755/1.071/0	7365/1.025/0	4220/2.19/2	8911/1.843/4
ERR732104	8902/30.166/0	8738/1.28/0	3143/9.733/6	1432/1.078/0	8905/1.139/0	4658/1.359/0	2315/4.41/40
ERR732105	8920/23.716/0	6062/1.074/0	4071/8.408/6	2887/1.082/0	6495/1.055/0	8813/1.78/0	3963/3.117/25
ERR732106	7785/6.736/0	7983/1.095/0	9052/3.285/0	1103/1.047/0	3022/1.049/0	4823/2.446/0	5755/1.582/2
ERR732107	4574/1.539/0	9005/1.024/0	8961/1.119/0	4281/1.003/0	3478/1.123/0	4736/2.361/0	4509/1.403/0
ERR732108	9039/1.089/0	9039/1.089/0	7372/1.09/2	1445/1.027/0	6010/1.03/0	5658/2.426/0	5658/1.338/1
ERR732109	4426/2.219/2	3297/1.771/0	3574/1.957/1	752/1.026/0	4571/1.018/0	4328/3.163/3	2368/1.612/6
ERR732110	8955/22.187/0	8037/1.074/0	6948/2.964/1	1890/1.032/0	9071/1.021/0	4328/1.119/0	4733/1.785/3
ERR732111	5802/16.138/0	2086/1.446/1	4993/2.917/3	2750/1.038/0	2508/1.075/0	4692/1.912/0	4333/1.749/4
ERR732112	4333/1.744/0	4450/1.102/0	4615/1.088/0	1567/1.044/0	4609/1.045/0	4523/1.072/0	4609/1.074/0
ERR732113	7059/3.222/0	3077/1.124/0	4388/2.15/2	895/1.049/0	3046/1.063/0	3046/2.152/0	7494/1.581/5
ERR732114	6639/6.639/0	4684/1.064/1	4340/4.077/0	1351/1.024/0	3651/1.147/0	5714/1.909/0	6948/1.427/2
ERR732115	8033/12.444/0	5581/1.074/0	8185/4.135/0	1932/1.064/0	4985/1.048/0	3920/3.949/0	3017/1.322/1
ERR732116	4504/30.692/0	2407/1.058/0	7186/5.037/3	1741/1.048/0	5203/1.154/0	4717/4.103/0	4337/1.613/4
ERR732117	3082/1.652/0	3082/1.145/0	3077/1.636/0	2189/1.035/0	3076/1.017/0	3082/2.219/0	2240/1.103/0
ERR732118	9032/3.851/0	9032/1.134/0	8066/3.429/0	1881/1.068/0	6061/1.032/0	4775/2.479/0	8917/1.132/2
ERR732119	6994/15.819/8	4186/1.179/1	7288/3.796/0	1959/1.083/0	2567/1.202/0	3069/3.252/0	7276/1.56/0
ERR732120	7368/1.037/0	7368/1.043/0	7363/1.038/0	2859/1.083/0	7039/1.032/0	4494/2.194/0	7368/1.237/2
ERR732121	7368/1.052/0	5553/1.043/0	7363/4.117/0	2859/1.007/0	6810/1.033/0	6240/1.566/0	7317/1.842/1
ERR732122	7368/3.809/0	3222/1.034/0	7368/1.021/0	3128/1.009/0	7063/1.01/0	7345/1.931/0	4539/1.075/0
ERR732123	7357/1.072/1	6543/1.178/1	7357/1.983/1	2718/1.016/1	7357/1.031/1	4455/2.384/1	7362/1.046/1
ERR732124	1928/1.397/0	1928/1.356/0	1928/1.353/0	1923/1.143/0	1928/1.094/0	1928/4.143/0	1928/1.269/0
ERR732125	572/1.049/0	926/1.089/0	491/1.369/0	503/1.064/0	None/0.0/None	571/1.182/0	926/1.118/0
ERR732126	7491/2.808/0	2944/1.303/0	6339/1.851/0	3058/1.093/0	4882/1.066/0	7344/2.317/1	5728/1.282/0
ERR732127	1770/1.193/0	1927/1.174/0	1927/1.141/0	1685/1.168/0	1229/1.047/0	1927/2.945/0	1927/1.658/2
ERR732128	7137/1.052/0	7136/1.029/1	4446/1.746/0	3051/1.033/1	-	4135/2.368/1	4146/1.382/0
ERR732129	9057/1.114/0	9057/1.085/0	8066/7.284/1	1678/1.016/0	5223/1.031/0	4343/2.242/0	9052/1.212/1
ERR732130	8054/12.834/0	9076/1.122/0	7234/1.667/0	2062/1.025/0	7385/1.031/0	4458/2.054/0	7838/1.598/1
ERR732131	8997/32.7/0	7912/1.056/0	9066/3.563/0	1525/1.046/0	8122/1.037/0	9054/1.79/0	5589/1.757/8
ERR732132	8039/45.591/0	3257/1.284/1	3360/4.73/5	None/0.0/None	7819/1.037/0	8063/3.566/0	4595/2.305/12
